# Supplementary material for: Queen and king recognition in the subterranean termite, Reticulitermes flavipes: Evidence for royal recognition pheromones
Source: PLoS One. 2019 May 30;14(5):e0209810. doi: 10.1371/journal.pone.0209810 (PMC6542537; doi:10.1371/journal.pone.0209810)
Supplement: S1 Dataset — (XLSX) [file pone.0209810.s001.xlsx]

## Sheet: Figure 1 Overall Behaviors
Treatment (Individual observed)	Replicate	% Time Moving	Active Antennation	Reactive Antennation	Active Allogrooming	Reactive Allogrooming	Active Shaking	Reactive Shaking
worker	1	52.8704	27.9444	24.4444	0.5	0.555556	7.94444	9.61111
worker	2	63.2778	29.9167	23.9167	0.333333	0.25	10.5	10.5
worker	3	49.2353	32.8824	28.5294	1.05882	0.882353	9.94118	10.1765
worker	4	57.0833	35.8333	26.9167	0.416667	0.916667	17.0833	5.91667
worker	5	39.1333	23.2	22.3333	0.466667	0.4	4.13333	8.73333
worker	6	42.7179	27.3846	18.7692	0.615385	1.07692	7	9.15385
worker	7	41.8125	25	24.8125	0.8125	0.9375	7.4375	11.875
worker	8	17.619	16.8571	18.5714	1.64286	0.857143	2.78571	8.28571
worker	9	48.4375	28.625	24.1875	0.3125	0.25	7	7.5
worker	10	52.25	31	26	0.416667	0.25	12.8333	4.75
worker	11	40.8333	25.6667	19.5	1.83333	1	10	10.5
worker	12	27.0667	15	21.8	0.8	1.2	2.6	8
worker	13	60.4167	46.75	41.25	0.5	1.25	4.5	1.25
worker	14	60.7333	38.4	31.6	1.8	0.8	9.4	2
worker	15	38.4167	37.25	38.5	0.25	0.75	9.5	1
worker	16	6.16667	13	8	6	4	0	0
worker	17	25.1667	25.5	33.75	0.75	1.75	0	0.5
worker	18	4	18	24	2	1.5	0	0.5
worker	19	25.1667	25.5	33.75	0.75	1.75	0	0.5
soldier	1	26.0222	14.2	19.2667	0	0.933333	2.46667	8.53333
soldier	2	23.6429	19.0714	20.4286	0	0.285714	2.71429	8.21429
soldier	3	22.8571	13.2143	19.3571	0	1.07143	2.64286	4.14286
soldier	4	33.9231	15.0769	13.8462	0	0.538462	6.23077	5.38462
soldier	5	25.9722	15.25	13.8333	0	0	2	5.75
soldier	6	19.2222	10.8333	20.3333	0	0.5	2.83333	9.83333
soldier	7	13.8	16	26.8	0	2	5	0.4
soldier	8	14.5	10.5	19	0.5	2	8	7
soldier	9	39.3333	22	15.5	0	5	8	1.5
soldier	10	18.8095	39.2857	24.8571	0	1.71429	17.1429	1.14286
soldier	11	17.7143	13.1429	25.1429	0	1.28571	0.857143	4
soldier	12	13.7917	16.75	18	0	0.5	3.5	0.5
soldier	13	12.3056	19.3333	22.5	0	1.5	8.83333	0.833333
soldier	14	13.7917	16.75	18	0	0.5	3.5	0.5
king	1	75	16	43	0	2	0	64
king	2	0	3	44	0	8	0	41
king	3	0	5	20	0	3	0	11
king	4	0	6	36	0	1	0	48
king	5	0	1	19	0	0	0	15
king	6	39.3333	19	79	0	0	1	72
king	7	1.33333	8	37	0	0	0	55
king	8	23.3333	15	39	0	0	2	26
queen	1	28.3137	20.4706	41.8824	0	1.94118	2.52941	28.2941
queen	2	42.375	25.3125	50.25	0	2.0625	7.0625	33
queen	3	35.2667	20.6	40.1333	0	2.46667	0.8	19.7333
queen	4	16.2	14.6	35	0	3.26667	0.333333	22.9333
queen	5	22.6444	19.0667	42.8	0	2.4	3.86667	28.5333
queen	6	46.3333	21.5	106.5	0	3.33333	6.66667	29.6667
queen	7	50.0833	17.3333	84	0	2.66667	6.83333	17.6667
queen	8	47.25	34	113.5	0	3.83333	3.33333	22
queen	9	35.2778	17.3333	74.6667	0	2.83333	5.33333	7.66667

## Sheet: Figure 2 Photo Scoto behavior
Phase	Light Conditions	Treatment	Replicate	Date	Minutes	Total Reactive Antennation	Total Reactive Shaking
Photophase	Dark	Live Queen	1	2016-02-24	7	131	29
Photophase	Dark	Live Queen	2	2016-02-24	7	129	25
Photophase	Dark	Live Queen	3	2016-02-24	7	155	31
Scotophase	Dark	Live Queen	1	2016-02-25	7	119	27
Scotophase	Dark	Live Queen	2	2016-02-25	7	124	36
Scotophase	Dark	Live Queen	3	2016-02-25	7	150	29
Photophase	Light	Live Queen	1	2016-02-24	7	150	108
Photophase	Light	Live Queen	2	2016-02-24	7	129	82
Photophase	Light	Live Queen	3	2016-02-24	7	141	82
Scotophase	Light	Live Queen	1	2016-02-25	7	171	80
Scotophase	Light	Live Queen	2	2016-02-25	7	169	78
Scotophase	Light	Live Queen	3	2016-02-25	7	220	73

## Sheet: Figure 3 Foreign v Native
Treatment	Replicate	Date	Antennation events	Shaking events
native worker	1	2016-03-03	142	5
native worker	2	2016-03-03	107	31
native worker	3	2016-03-03	76	9
native worker	4	2016-03-03	84	24
native worker	5	2016-03-03	109	18
native worker	6	2016-03-03	92	15
native worker	7	2016-03-03	78	18
native worker	8	2016-03-03	98	0
native worker	9	2016-03-03	69	13
native worker	10	2016-03-03	137	5
foreign worker	1	2016-03-21	142	12
foreign worker	2	2016-03-21	124	32
foreign worker	3	2016-03-21	101	32
foreign worker	4	2016-03-28	154	14
foreign worker	5	2016-03-28	148	23
foreign worker	6	2016-03-28	108	57
foreign worker	7	2016-03-28	154	19
foreign worker	8	2016-03-28	148	20
foreign worker	9	2016-03-28	94	30
foreign worker	10	2016-03-28	125	15
native queen	1	2016-02-24	150	108
native queen	2	2016-02-24	129	82
native queen	3	2016-02-24	141	82
native queen	4	2016-02-25	171	80
native queen	5	2016-02-25	169	78
native queen	6	2016-02-25	220	73
foreign queen	1	2016-03-21	163	87
foreign queen	2	2016-03-21	188	84
foreign queen	3	2016-03-21	241	88
foreign queen	4	2016-03-21	265	80
foreign queen	5	2016-03-21	201	89
foreign queen	6	2016-03-28	206	86
foreign queen	7	2016-03-28	181	88
foreign queen	8	2016-03-28	195	70
foreign queen	9	2016-03-28	216	71
foreign queen	10	2016-03-28	218	79

## Sheet: Figure 4 Live workers perfumed
Treatment	Ratio	Replicate	Date	Antennation events	Shaking events
W : W ratio	2.7	1	2016-03-03	142	5
W : W ratio	2.7	2	2016-03-03	107	31
W : W ratio	2.7	3	2016-03-03	76	9
W : W ratio	2.7	4	2016-03-03	84	24
W : W ratio	2.7	5	2016-03-03	109	18
W : W ratio	2.7	6	2016-03-03	92	15
W : W ratio	2.7	7	2016-03-03	78	18
W : W ratio	2.7	8	2016-03-03	98	0
W : W ratio	2.7	9	2016-03-03	69	13
W : W ratio	2.7	10	2016-03-03	137	5
Q : W ratio	0.5	1	2016-03-03	121	25
Q : W ratio	0.5	2	2016-03-03	133	18
Q : W ratio	0.5	3	2016-03-03	131	19
Q : W ratio	0.5	4	2016-03-03	145	23
Q : W ratio	0.5	5	2016-03-03	155	25
Q : W ratio	0.5	6	2016-03-03	124	35
Q : W ratio	0.5	7	2016-03-03	132	38
Q : W ratio	0.5	8	2016-03-03	166	22
Q : W ratio	0.5	9	2016-03-03	129	31
Q : W ratio	0.5	10	2016-03-03	160	28
Q : W ratio	1	1	2016-04-11	112	22
Q : W ratio	1	2	2016-04-11	102	32
Q : W ratio	1	3	2016-04-11	150	40
Q : W ratio	1	4	2016-04-11	122	36
Q : W ratio	1	5	2016-04-11	128	33
Q : W ratio	1	6	2016-04-11	141	40
Q : W ratio	1	7	2016-04-11	105	23
Q : W ratio	1	8	2016-04-11	115	52
Q : W ratio	1	9	2016-04-11	108	48
Q : W ratio	1	10	2016-04-11	116	32
Q : W ratio	5	1	2016-03-23	125	51
Q : W ratio	5	2	2016-03-23	184	58
Q : W ratio	5	3	2016-03-23	122	62
Q : W ratio	5	4	2016-03-23	185	49
Q : W ratio	5	5	2016-03-23	133	53
Q : W ratio	5	6	2016-03-23	146	39
Q : W ratio	5	7	2016-03-23	140	52
Q : W ratio	5	8	2016-03-23	183	46
Q : W ratio	5	9	2016-03-23	129	68
Q : W ratio	5	10	2016-03-23	162	43
Q : W ratio	10	1	2016-04-11	119	41
Q : W ratio	10	2	2016-04-11	127	34
Q : W ratio	10	3	2016-04-11	158	90
Q : W ratio	10	4	2016-04-11	161	72
Q : W ratio	10	5	2016-04-11	164	56
Q : W ratio	10	6	2016-04-11	176	59
Q : W ratio	10	7	2016-04-11	136	39
Q : W ratio	10	8	2016-04-11	160	67
Q : W ratio	10	9	2016-04-11	131	36
Q : W ratio	10	10	2016-04-11	153	46
live queen		1	2016-02-24	150	108
live queen		2	2016-02-24	129	82
live queen		3	2016-02-24	141	82
live queen		4	2016-02-25	171	80
live queen		5	2016-02-25	169	78
live queen		6	2016-02-25	220	73

## Sheet: Figure 5 queen coated dummies
Extract	Replicate	Concentration (in QE)	Antennation	Shaking	Colony
Worker	1	6	54	2	15May13.4
Worker	2	6	33	5	15May13.4
Worker	3	6	25	3	15May13.4
Worker	4	6	101	8	15May13.4
Worker	5	6	36	2	15May13.4
Worker	6	6	35	3	15May13.4
Worker	7	6	20	5	15May13.4
Worker	8	6	17	2	15May13.4
Worker	9	6	55	18	15May13.4
Worker	10	6	58	0	15May13.4
Hexane	1	0	21	0	15May13.4
Hexane	2	0	40	2	15May13.4
Hexane	3	0	25	0	15May13.4
Hexane	4	0	28	6	15May13.4
Hexane	5	0	30	0	15May13.4
Hexane	6	0	31	4	15May13.4
Hexane	7	0	49	0	15May13.4
Hexane	8	0	8	0	15May13.4
Hexane	9	0	45	2	15May13.4
Hexane	10	0	43	0	15May13.4
Hexane	11	0	47	5	YMP30Sep13.3
Hexane	12	0	27	4	YMP30Sep13.3
Hexane	13	0	33	0	YMP30Sep13.3
Hexane	14	0	30	9	YMP30Sep13.3
Hexane	15	0	57	6	YMP30Sep13.3
Hexane	16	0	51	0	YMP30Sep13.3
Hexane	17	0	43	6	YMP30Sep13.3
Hexane	18	0	22	3	YMP30Sep13.3
Hexane	19	0	33	3	YMP30Sep13.3
Hexane	20	0	3	0	YMP30Sep13.3
Queen	1	0.1	15	1	15May13.4
Queen	2	0.1	44	7	15May13.4
Queen	3	0.1	5	0	15May13.4
Queen	4	0.1	43	4	15May13.4
Queen	5	0.1	21	1	15May13.4
Queen	6	0.1	13	0	15May13.4
Queen	7	0.1	44	3	15May13.4
Queen	8	0.1	34	1	15May13.4
Queen	9	0.1	55	7	15May13.4
Queen	10	0.1	40	3	15May13.4
Queen	11	0.1	37	3	YMP30Sep13.3
Queen	12	0.1	49	1	YMP30Sep13.3
Queen	13	0.1	40	16	YMP30Sep13.3
Queen	14	0.1	4	1	YMP30Sep13.3
Queen	15	0.1	39	3	YMP30Sep13.3
Queen	16	0.1	0	1	YMP30Sep13.3
Queen	17	0.1	3	0	YMP30Sep13.3
Queen	18	0.1	9	1	YMP30Sep13.3
Queen	19	0.1	13	4	YMP30Sep13.3
Queen	20	0.1	38	12	YMP30Sep13.3
Queen	1	0.3	33	3	15May13.4
Queen	2	0.3	47	7	15May13.4
Queen	3	0.3	62	10	15May13.4
Queen	4	0.3	20	29	15May13.4
Queen	5	0.3	20	3	15May13.4
Queen	6	0.3	51	2	15May13.4
Queen	7	0.3	55	7	15May13.4
Queen	8	0.3	51	3	15May13.4
Queen	9	0.3	73	3	15May13.4
Queen	10	0.3	49	0	15May13.4
Queen	11	0.3	37	8	YMP30Sep13.3
Queen	12	0.3	58	6	YMP30Sep13.3
Queen	13	0.3	27	5	YMP30Sep13.3
Queen	14	0.3	54	4	YMP30Sep13.3
Queen	15	0.3	30	8	YMP30Sep13.3
Queen	16	0.3	32	4	YMP30Sep13.3
Queen	17	0.3	51	14	YMP30Sep13.3
Queen	18	0.3	52	14	YMP30Sep13.3
Queen	19	0.3	59	5	YMP30Sep13.3
Queen	20	0.3	40	4	YMP30Sep13.3
Queen	1	1	24	4	15May13.4
Queen	2	1	58	15	15May13.4
Queen	3	1	55	14	15May13.4
Queen	4	1	79	8	15May13.4
Queen	5	1	44	12	15May13.4
Queen	6	1	51	42	15May13.4
Queen	7	1	23	9	15May13.4
Queen	8	1	84	4	15May13.4
Queen	9	1	10	0	15May13.4
Queen	10	1	46	14	15May13.4
Queen	11	1	50	28	YMP30Sep13.3
Queen	12	1	32	9	YMP30Sep13.3
Queen	13	1	43	19	YMP30Sep13.3
Queen	14	1	71	17	YMP30Sep13.3
Queen	15	1	43	7	YMP30Sep13.3
Queen	16	1	36	9	YMP30Sep13.3
Queen	17	1	39	7	YMP30Sep13.3
Queen	18	1	44	18	YMP30Sep13.3
Queen	19	1	81	17	YMP30Sep13.3
Queen	20	1	53	9	YMP30Sep13.3
Queen	1	3	39	16	15May13.4
Queen	2	3	87	23	15May13.4
Queen	3	3	93	14	15May13.4
Queen	4	3	72	9	15May13.4
Queen	5	3	71	22	15May13.4
Queen	6	3	86	24	15May13.4
Queen	7	3	69	6	15May13.4
Queen	8	3	64	23	15May13.4
Queen	9	3	109	20	15May13.4
Queen	10	3	50	15	15May13.4
Queen	11	3	46	5	YMP30Sep13.3
Queen	12	3	29	2	YMP30Sep13.3
Queen	13	3	49	21	YMP30Sep13.3
Queen	14	3	40	7	YMP30Sep13.3
Queen	15	3	51	8	YMP30Sep13.3
Queen	16	3	55	16	YMP30Sep13.3
Queen	17	3	54	15	YMP30Sep13.3
Queen	18	3	48	9	YMP30Sep13.3
Queen	19	3	51	5	YMP30Sep13.3

## Sheet: Figure 6 king coated dummies
Extract	Replicate	Concentration (in KE)	Antennation	Shaking	Colony
Worker	1	6	54	2	15May13.4
Worker	2	6	33	5	15May13.4
Worker	3	6	25	3	15May13.4
Worker	4	6	101	8	15May13.4
Worker	5	6	36	2	15May13.4
Worker	6	6	35	3	15May13.4
Worker	7	6	20	5	15May13.4
Worker	8	6	17	2	15May13.4
Worker	9	6	55	18	15May13.4
Worker	10	6	58	0	15May13.4
Hexane	1	0	21	0	15May13.4
Hexane	2	0	40	2	15May13.4
Hexane	3	0	25	0	15May13.4
Hexane	4	0	28	6	15May13.4
Hexane	5	0	30	0	15May13.4
Hexane	6	0	31	4	15May13.4
Hexane	7	0	49	0	15May13.4
Hexane	8	0	8	0	15May13.4
Hexane	9	0	45	2	15May13.4
Hexane	10	0	43	0	15May13.4
Hexane	11	0	47	5	YMP30Sep13.3
Hexane	12	0	27	4	YMP30Sep13.3
Hexane	13	0	33	0	YMP30Sep13.3
Hexane	14	0	30	9	YMP30Sep13.3
Hexane	15	0	57	6	YMP30Sep13.3
Hexane	16	0	51	0	YMP30Sep13.3
Hexane	17	0	43	6	YMP30Sep13.3
Hexane	18	0	22	3	YMP30Sep13.3
Hexane	19	0	33	3	YMP30Sep13.3
Hexane	20	0	3	0	YMP30Sep13.3
King	1	0.1	77	5	15May13.4
King	2	0.1	39	0	15May13.4
King	3	0.1	34	17	15May13.4
King	4	0.1	47	5	15May13.4
King	5	0.1	52	8	15May13.4
King	6	0.1	23	3	YMP30Sep13.3
King	7	0.1	30	5	YMP30Sep13.3
King	8	0.1	28	2	YMP30Sep13.3
King	9	0.1	40	1	YMP30Sep13.3
King	10	0.1	14	1	YMP30Sep13.3
King	1	0.3	39	5	15May13.4
King	2	0.3	38	9	15May13.4
King	3	0.3	49	9	15May13.4
King	4	0.3	42	3	15May13.4
King	5	0.3	40	2	15May13.4
King	6	0.3	36	5	YMP30Sep13.3
King	7	0.3	31	14	YMP30Sep13.3
King	8	0.3	26	1	YMP30Sep13.3
King	9	0.3	39	13	YMP30Sep13.3
King	10	0.3	30	4	YMP30Sep13.3
King	1	1	31	13	15May13.4
King	2	1	69	11	15May13.4
King	3	1	70	17	15May13.4
King	4	1	38	8	15May13.4
King	5	1	59	3	15May13.4
King	6	1	15	15	YMP30Sep13.3
King	7	1	46	20	YMP30Sep13.3
King	8	1	38	19	YMP30Sep13.3
King	9	1	23	9	YMP30Sep13.3
King	10	1	29	20	YMP30Sep13.3
King	1	3	33	2	15May13.4
King	2	3	36	21	15May13.4
King	3	3	35	0	15May13.4
King	4	3	8	4	15May13.4
King	5	3	35	4	15May13.4
King	6	3	45	26	YMP30Sep13.3
King	7	3	46	40	YMP30Sep13.3
King	8	3	32	7	YMP30Sep13.3
King	9	3	60	14	YMP30Sep13.3
King	10	3	36	7	YMP30Sep13.3

## Sheet: Figure 7 Aggr to dummy extracts
Extract	Replicate	Concentration (in QE or KE)	Observed Aggression
Hexane	1	0	+
Hexane	2	0	+
Hexane	3	0	+
Hexane	4	0	+
Hexane	5	0	+
Hexane	6	0	-
Hexane	7	0	+
Hexane	8	0	-
Hexane	9	0	+
Hexane	10	0	+
Hexane	11	0	-
Hexane	12	0	+
Hexane	13	0	-
Hexane	14	0	+
Hexane	15	0	+
Hexane	16	0	-
Hexane	17	0	+
Hexane	18	0	+
Hexane	19	0	-
Hexane	20	0	-
Queen	1	0.1	-
Queen	2	0.1	-
Queen	3	0.1	-
Queen	4	0.1	-
Queen	5	0.1	-
Queen	6	0.1	-
Queen	7	0.1	-
Queen	8	0.1	-
Queen	9	0.1	-
Queen	10	0.1	-
Queen	11	0.1	+
Queen	12	0.1	-
Queen	13	0.1	+
Queen	14	0.1	-
Queen	15	0.1	+
Queen	16	0.1	-
Queen	17	0.1	-
Queen	18	0.1	+
Queen	19	0.1	-
Queen	20	0.1	+
Queen	1	0.3	-
Queen	2	0.3	-
Queen	3	0.3	-
Queen	4	0.3	-
Queen	5	0.3	-
Queen	6	0.3	-
Queen	7	0.3	-
Queen	8	0.3	-
Queen	9	0.3	-
Queen	10	0.3	-
Queen	11	0.3	+
Queen	12	0.3	-
Queen	13	0.3	-
Queen	14	0.3	-
Queen	15	0.3	-
Queen	16	0.3	-
Queen	17	0.3	-
Queen	18	0.3	-
Queen	19	0.3	-
Queen	20	0.3	-
Queen	1	1	-
Queen	2	1	-
Queen	3	1	-
Queen	4	1	-
Queen	5	1	-
Queen	6	1	-
Queen	7	1	-
Queen	8	1	-
Queen	9	1	-
Queen	10	1	-
Queen	11	1	-
Queen	12	1	-
Queen	13	1	+
Queen	14	1	-
Queen	15	1	-
Queen	16	1	-
Queen	17	1	+
Queen	18	1	+
Queen	19	1	-
Queen	20	1	-
Queen	1	3	-
Queen	2	3	-
Queen	3	3	-
Queen	4	3	-
Queen	5	3	-
Queen	6	3	-
Queen	7	3	-
Queen	8	3	-
Queen	9	3	-
Queen	10	3	-
Queen	11	3	-
Queen	12	3	-
Queen	13	3	-
Queen	14	3	-
Queen	15	3	+
Queen	16	3	-
Queen	17	3	-
Queen	18	3	-
Queen	19	3	-
King	1	0.1	-
King	2	0.1	-
King	3	0.1	-
King	4	0.1	-
King	5	0.1	-
King	6	0.1	-
King	7	0.1	+
King	8	0.1	+
King	9	0.1	-
King	10	0.1	+
King	1	0.3	-
King	2	0.3	-
King	3	0.3	-
King	4	0.3	-
King	5	0.3	-
King	6	0.3	+
King	7	0.3	-
King	8	0.3	-
King	9	0.3	+
King	10	0.3	-
King	1	1	-
King	2	1	-
King	3	1	-
King	4	1	-
King	5	1	-
King	6	1	-
King	7	1	-
King	8	1	-
King	9	1	-
King	10	1	-
King	1	3	-
King	2	3	-
King	3	3	-
King	4	3	-
King	5	3	-
King	6	3	-
King	7	3	-
King	8	3	-
King	9	3	-
King	10	3	-
Worker	1	6	-
Worker	2	6	+
Worker	3	6	-
Worker	4	6	+
Worker	5	6	-
Worker	6	6	-
Worker	7	6	-
Worker	8	6	-
Worker	9	6	-
Worker	10	6	-
